# Supplementary material
Source: PubMed Central journal article supplement (PMC7539292)

**a**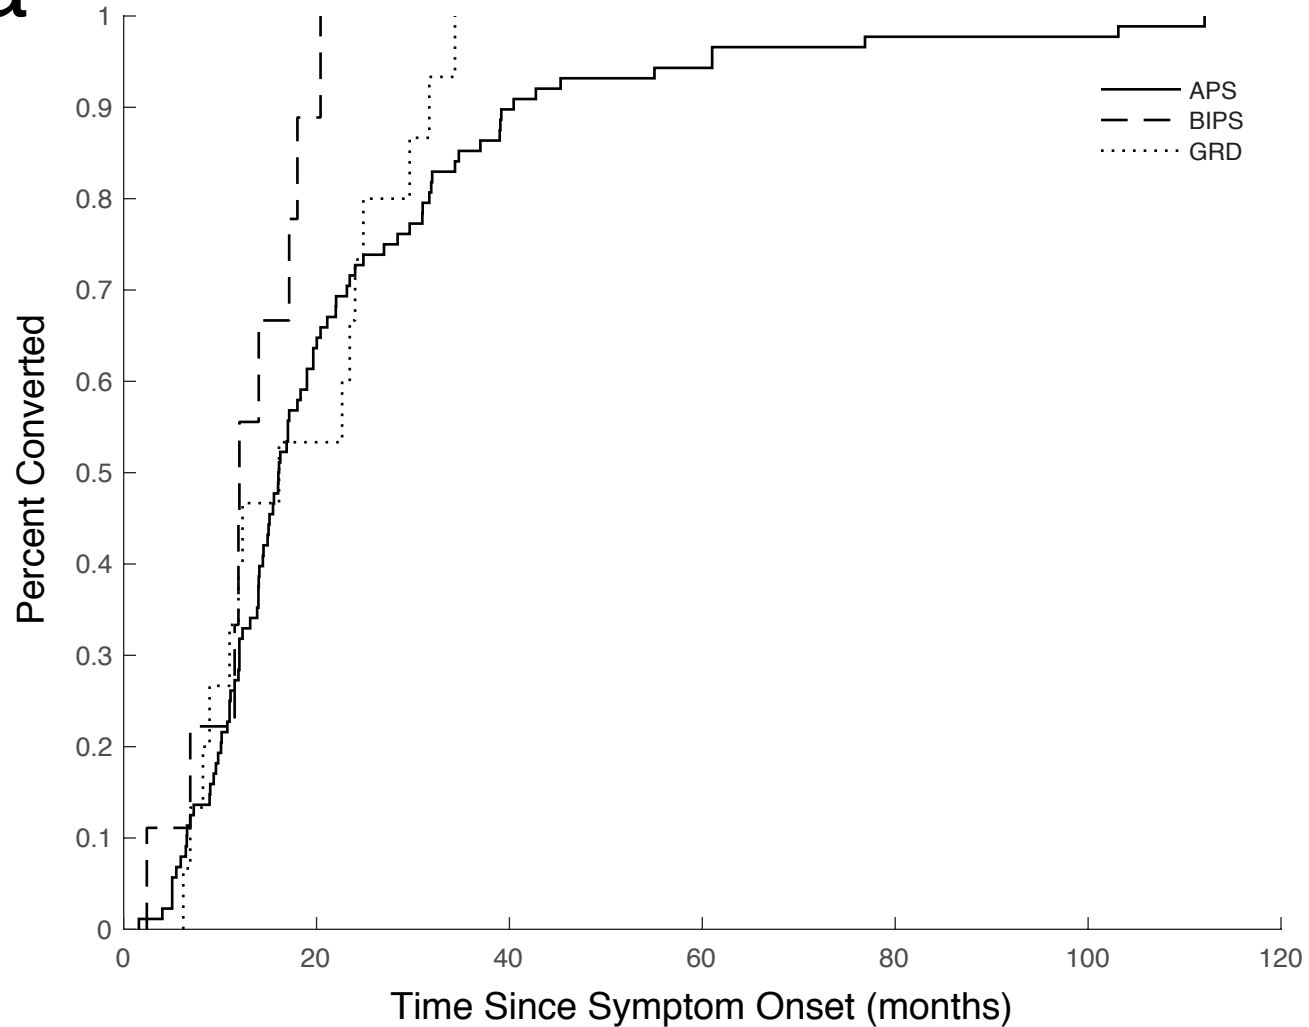**b**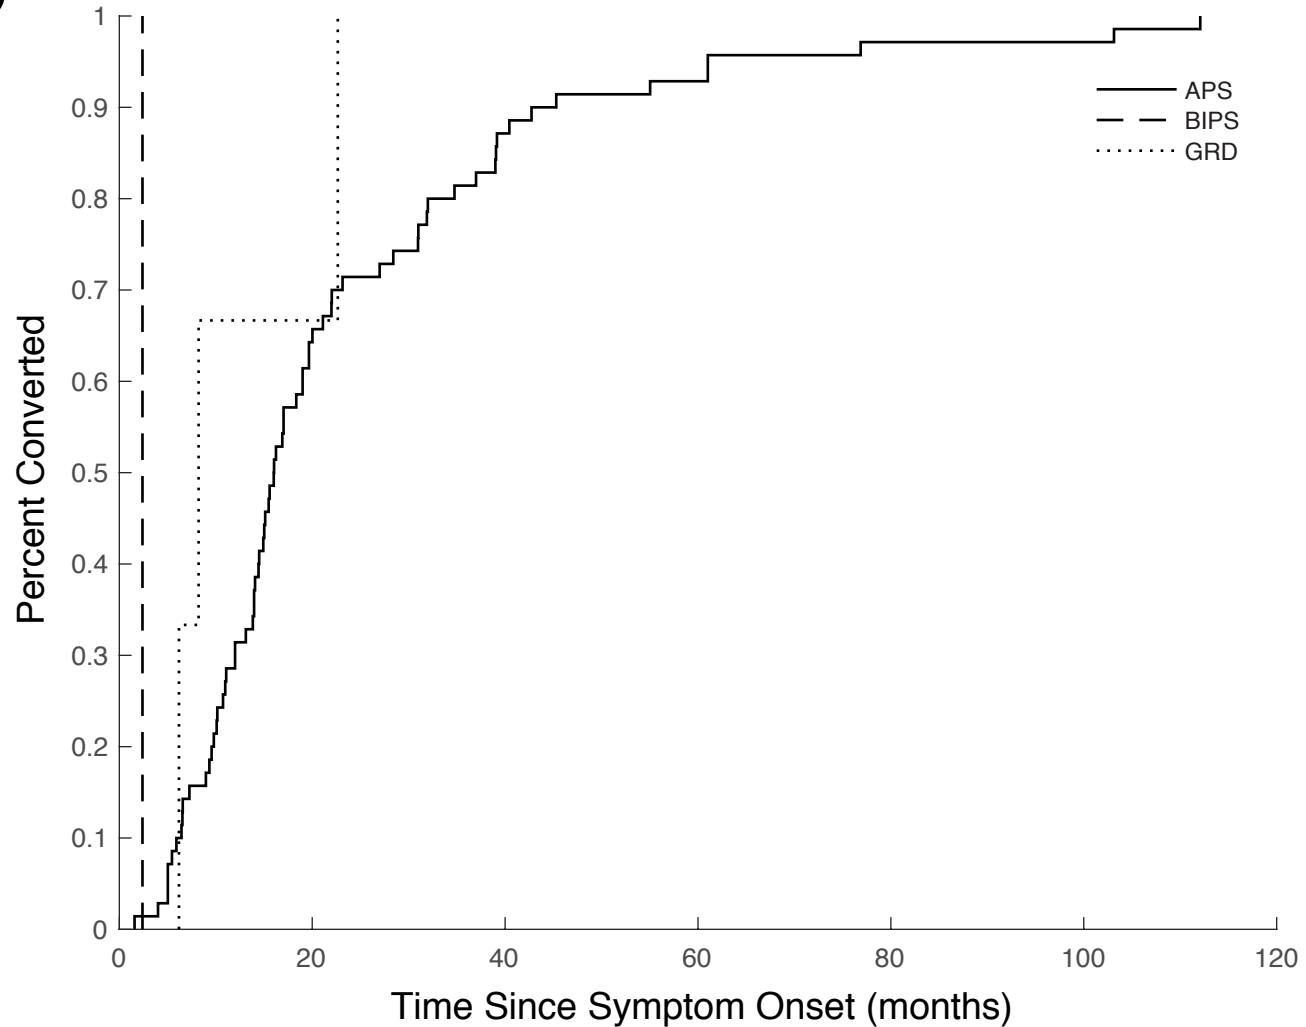

Supplement: NIHMS1622975-supplement-Figure_S1.pdf [file NIHMS1622975-supplement-Figure_S1.pdf]

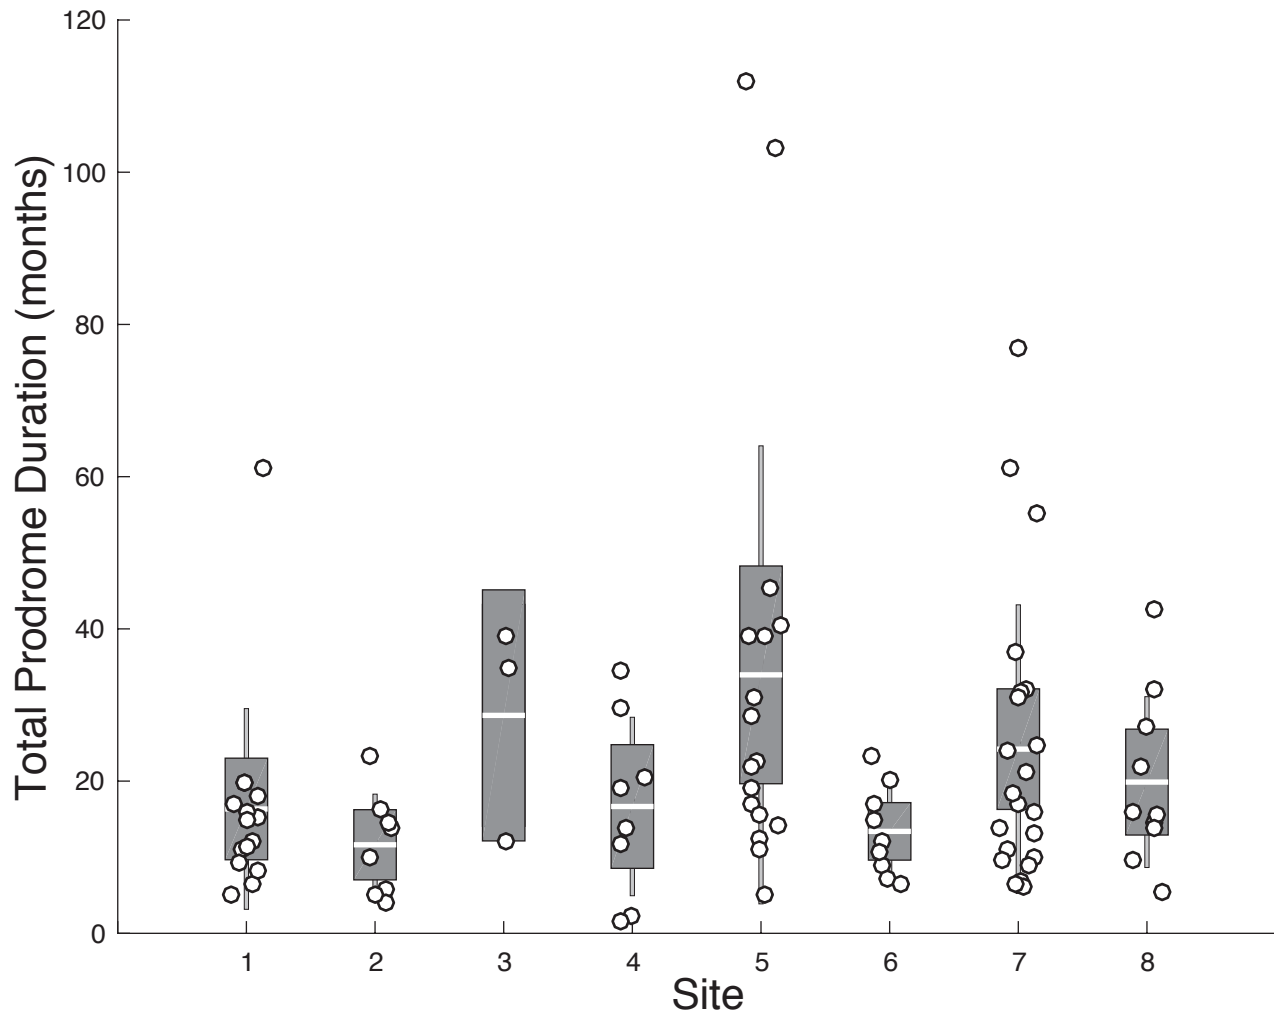

Supplement: NIHMS1622975-supplement-Figure_S2.pdf [file NIHMS1622975-supplement-Figure_S2.pdf]
